# Supplementary material for: Microbial transformations of 4′-methylchalcones as an efficient method of obtaining novel alcohol and dihydrochalcone derivatives with antimicrobial activity
Source: PubMed Central journal article supplement (PMC9085419; doi:10.1039/c8ra04669g), 2018-08-30
Supplement: RA-008-C8RA04669G-s001.pdf [file RA-008-C8RA04669G-s001.pdf]

## Supplementary Information

### Microbial transformations of 4'-methylchalcones as efficient method of obtaining novel alcohol and dihydrochalcone derivatives with antimicrobial activity

Joanna Kozłowska,<sup>\*a</sup> Bartłomiej Potaniec,<sup>a</sup> Barbara Żarowska,<sup>b</sup> and Mirosław Anioł<sup>a</sup>

<sup>a</sup> Department of Chemistry, Wrocław University of Environmental and Life Sciences, Norwida 25, 50-375 Wrocław, Poland.

Email: joannakozlowska3@gmail.com,

<sup>b</sup> Department of Biotechnology and Food Microbiology, Wrocław University of Environmental and Life Sciences, Chelmońskiego 37, 51-630 Wrocław, Poland

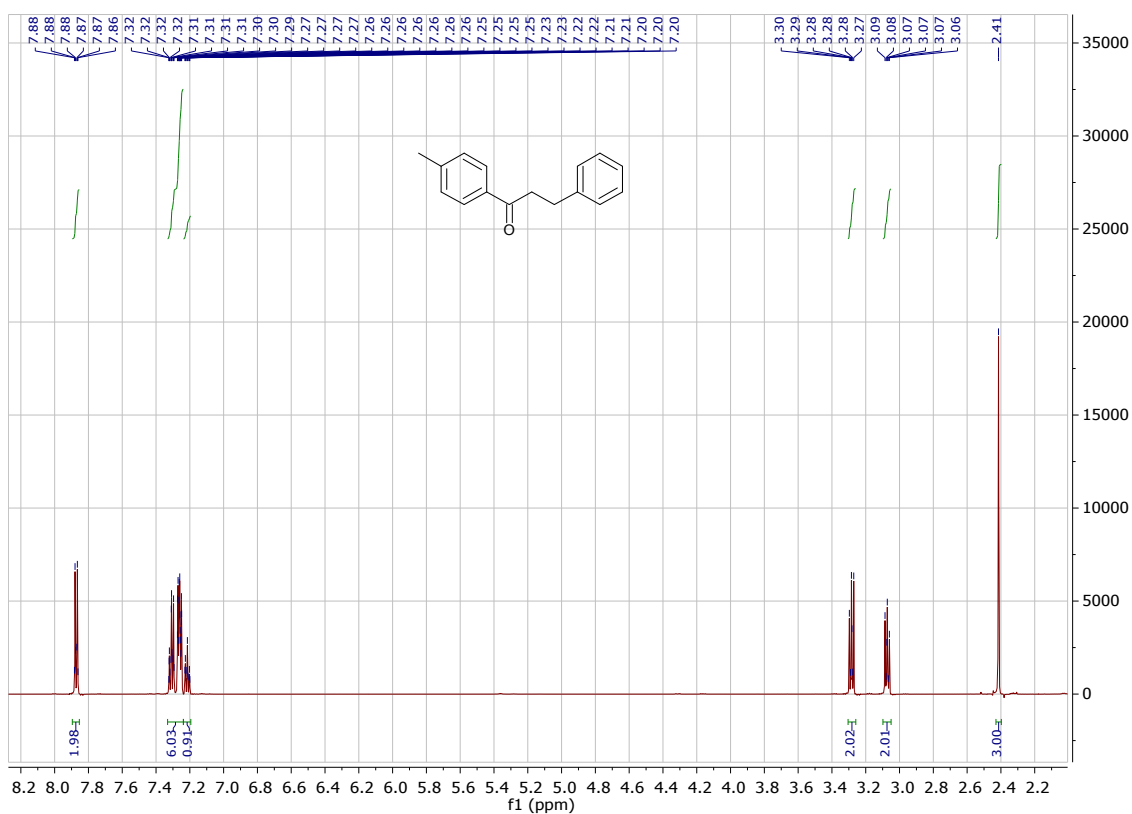

Fig S1. <sup>1</sup>H-NMR (600 MHz, CDCl<sub>3</sub>) spectrum of 4'-methyl- $\alpha,\beta$ -dihydrochalcone (**1a**)

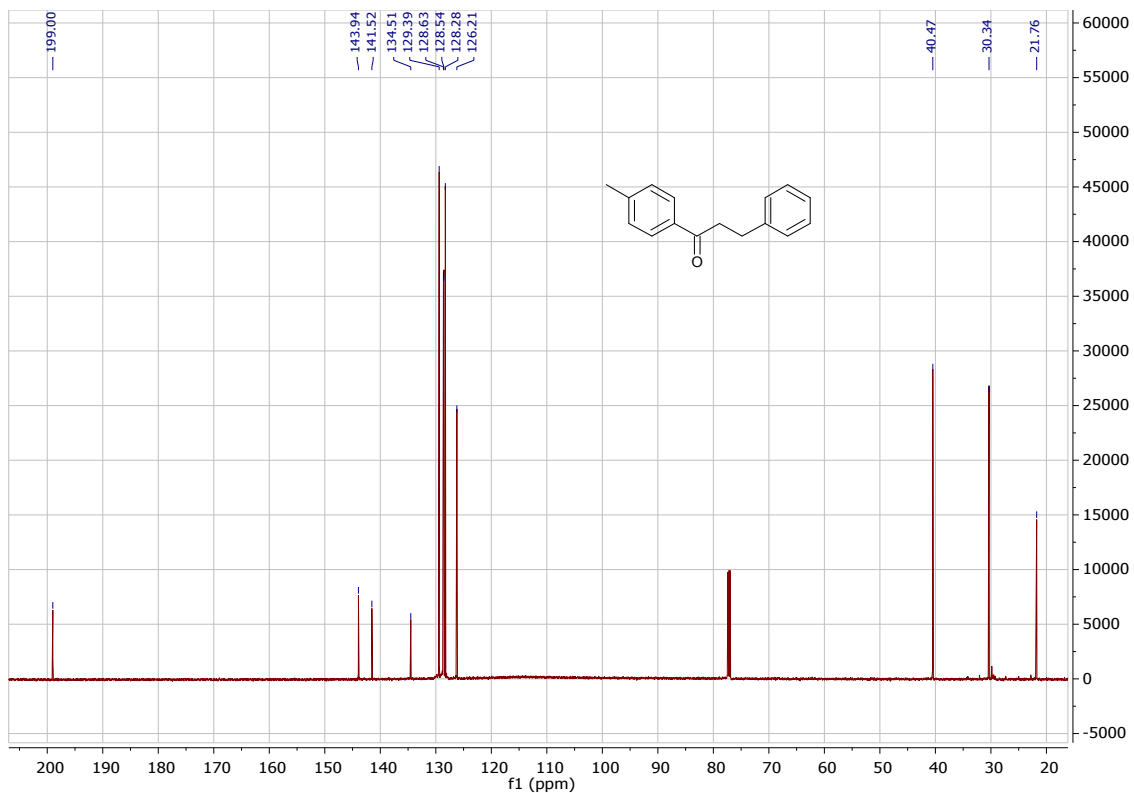

Fig S2.  $^{13}\text{C}$ -NMR (150 MHz,  $\text{CDCl}_3$ ) spectrum of 4'-methyl- $\alpha,\beta$ -dihydrochalcone (1a)

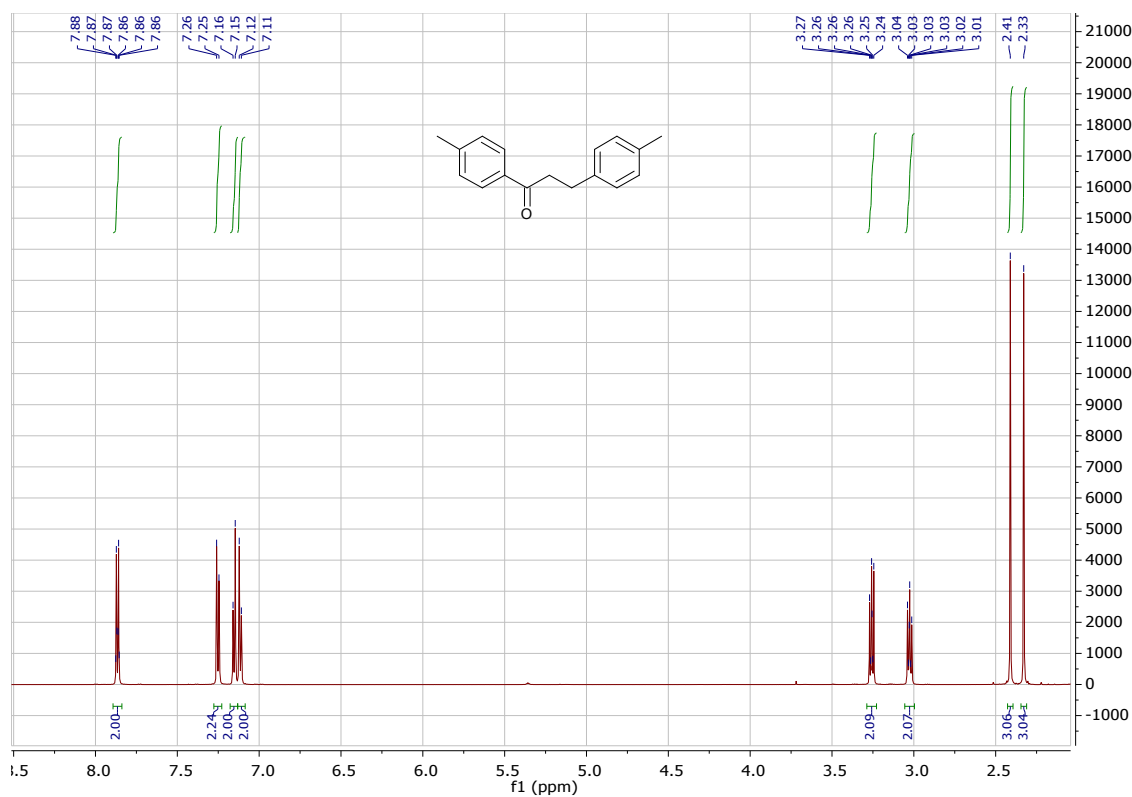

Fig S3.  $^1\text{H}$ -NMR (600 MHz,  $\text{CDCl}_3$ ) spectrum of 4'-methyl-4-methyl- $\alpha,\beta$ -dihydrochalcone (2a)

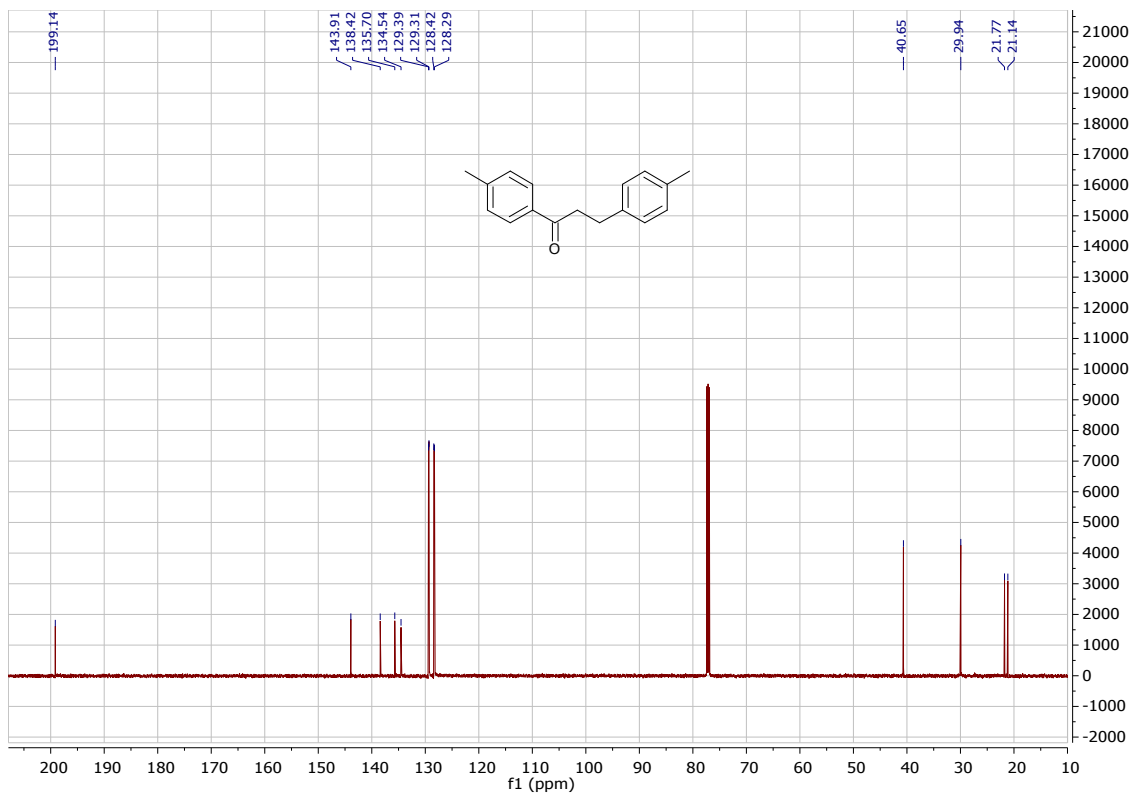

Fig S4.  $^{13}\text{C}$ -NMR (150 MHz,  $\text{CDCl}_3$ ) spectrum of 4'-methyl-4-methyl- $\alpha,\beta$ -dihydrochalcone (**2a**)

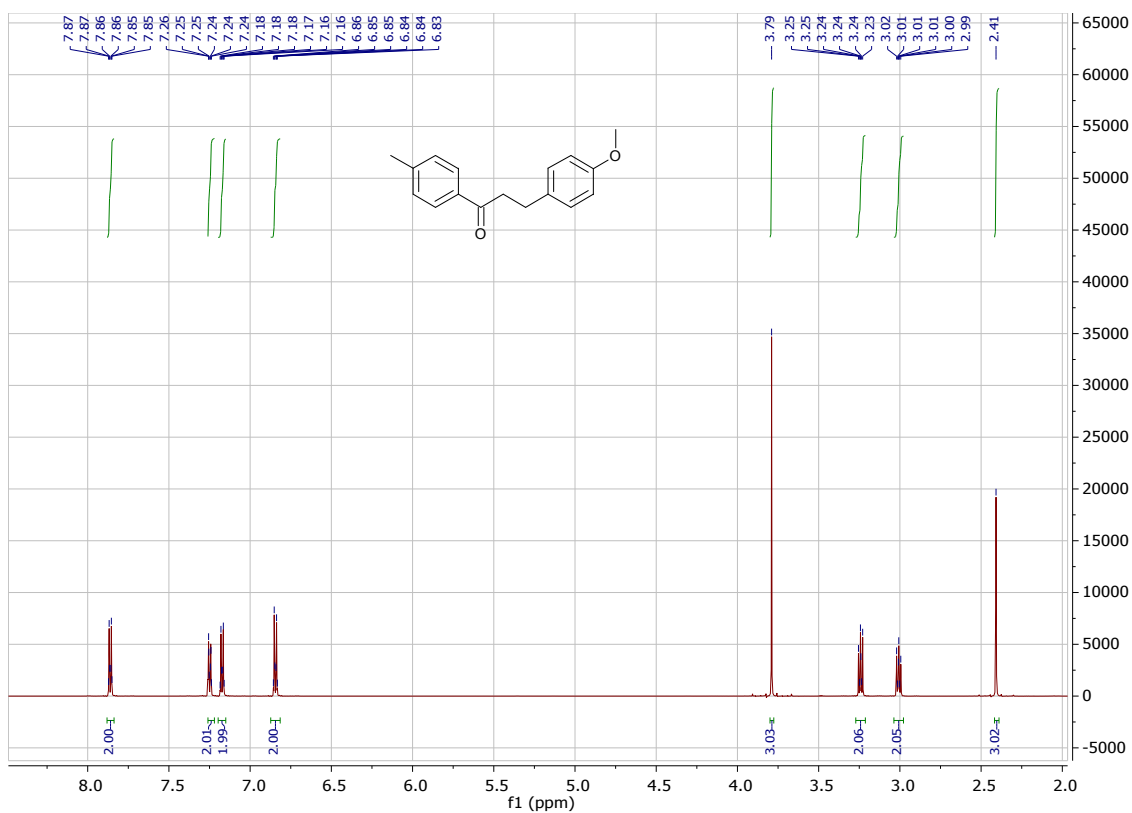

Fig S5.  $^1\text{H}$ -NMR (600 MHz,  $\text{CDCl}_3$ ) spectrum of 4-methoxy-4'-methyl- $\alpha,\beta$ -dihydrochalcone (**3a**)

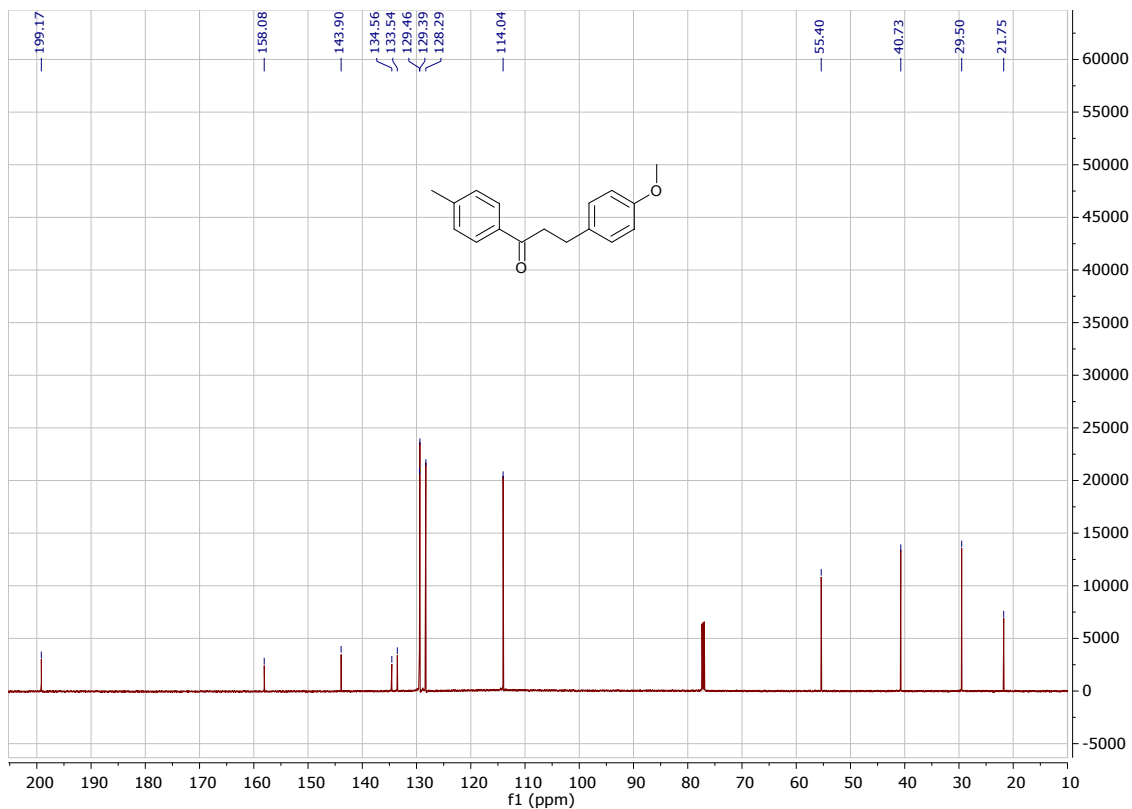

Fig S6.  $^{13}\text{C-NMR}$  (150 MHz,  $\text{CDCl}_3$ ) spectrum of 4-methoxy-4'-methyl- $\alpha,\beta$ -dihydrochalcone (3a)

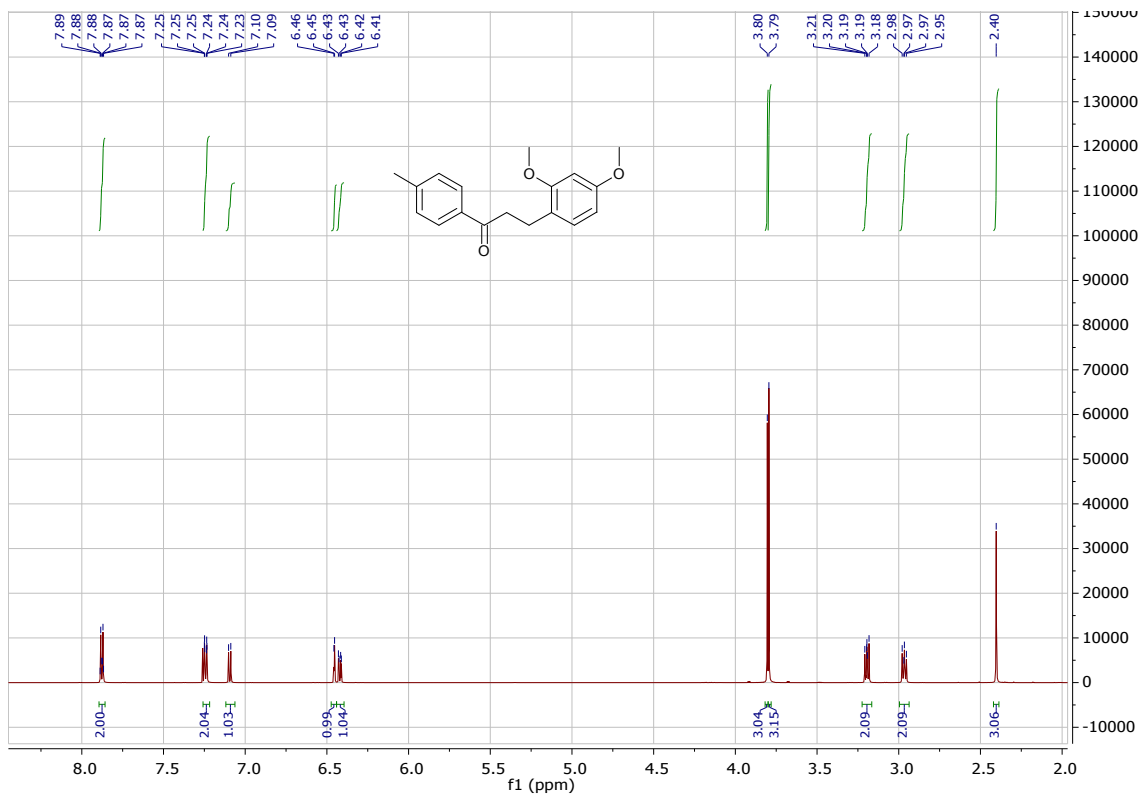

Fig S7.  $^1\text{H-NMR}$  (600 MHz,  $\text{CDCl}_3$ ) spectrum of 2,4-dimethoxy-4'-methyl- $\alpha,\beta$ -dihydrochalcone (4a)

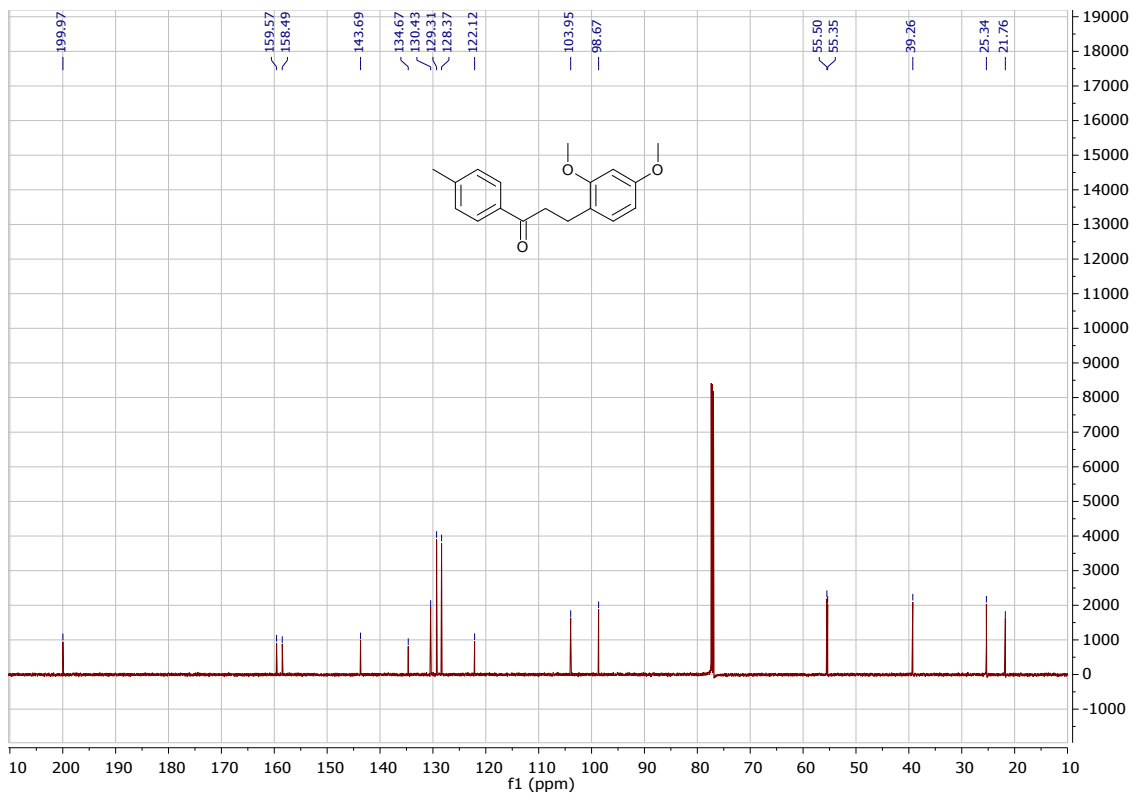

Fig S8.  $^{13}\text{C}$ -NMR (150 MHz,  $\text{CDCl}_3$ ) spectrum of 2,4-dimethoxy-4'-methyl- $\alpha,\beta$ -dihydrochalcone (**4a**)

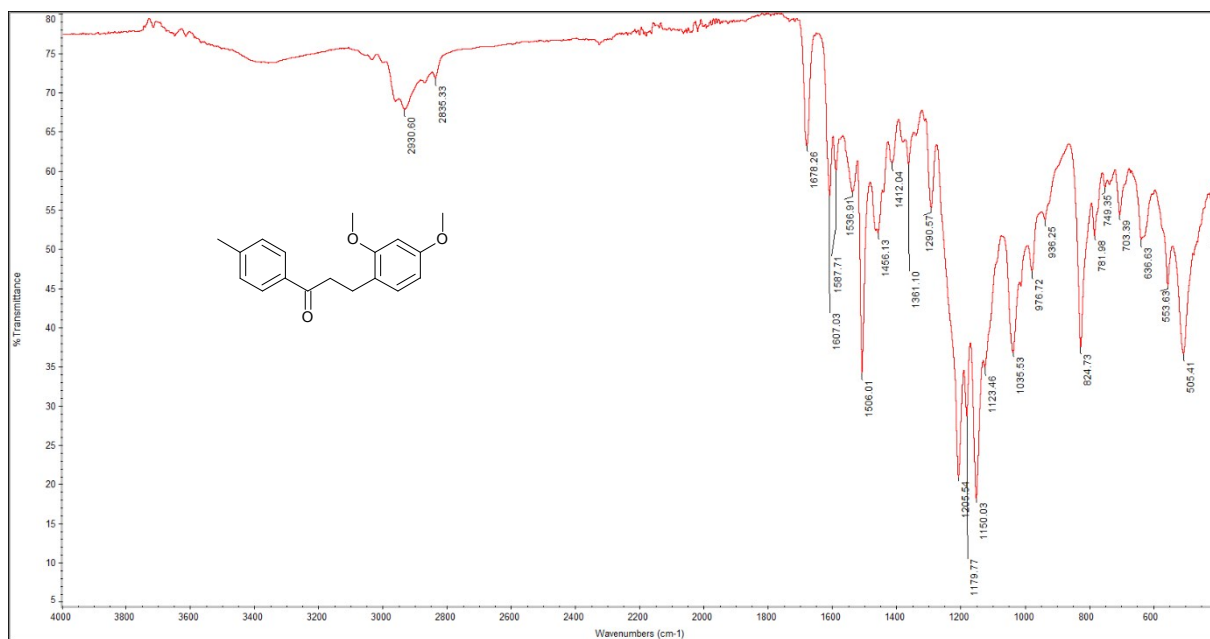

Fig S9. FTIR-ATR spectrum of 2,4-dimethoxy-4'-methyl- $\alpha,\beta$ -dihydrochalcone (**4a**)

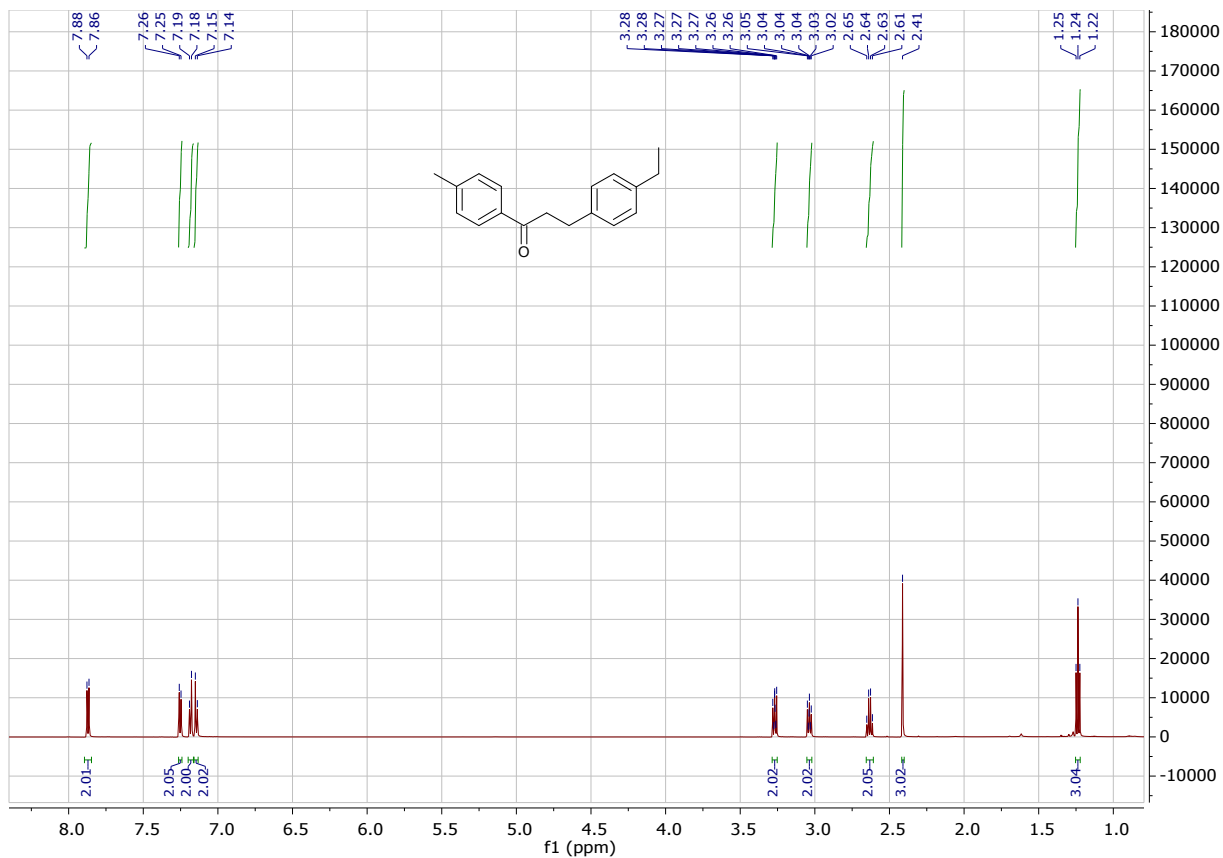

Fig S10.  $^1\text{H-NMR}$  (600 MHz,  $\text{CDCl}_3$ ) spectrum of 4-ethyl-4'-methyl- $\alpha,\beta$ -dihydrochalcone (5a)

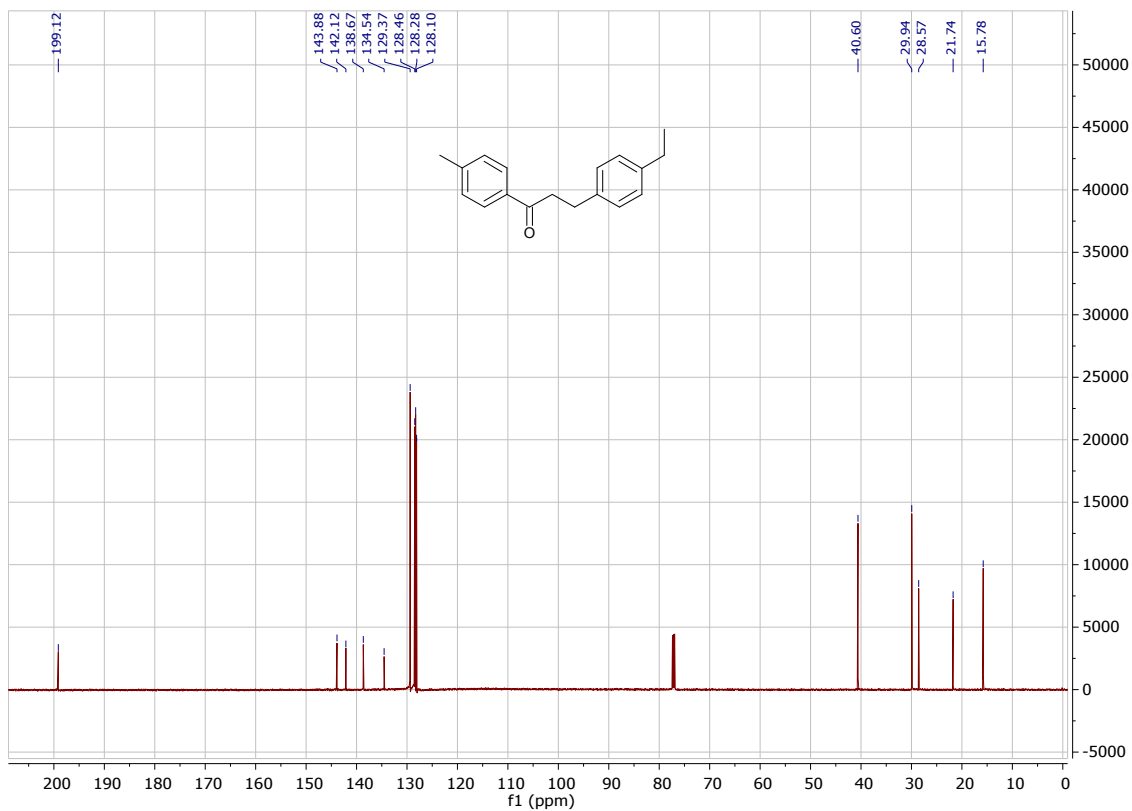

Fig S11.  $^{13}\text{C-NMR}$  (150 MHz,  $\text{CDCl}_3$ ) spectrum of 4-ethyl-4'-methyl- $\alpha,\beta$ -dihydrochalcone (5a)

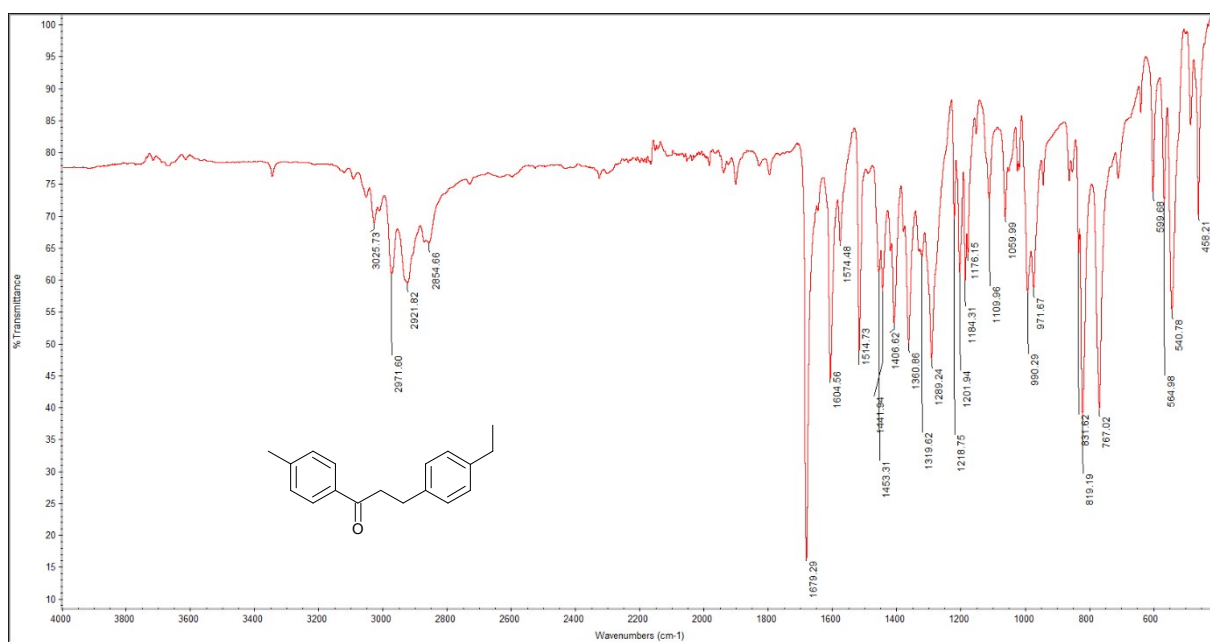

Fig S12. FTIR-ATR spectrum of 4-ethyl-4'-methyl- $\alpha,\beta$ -dihydrochalcone (**5a**)

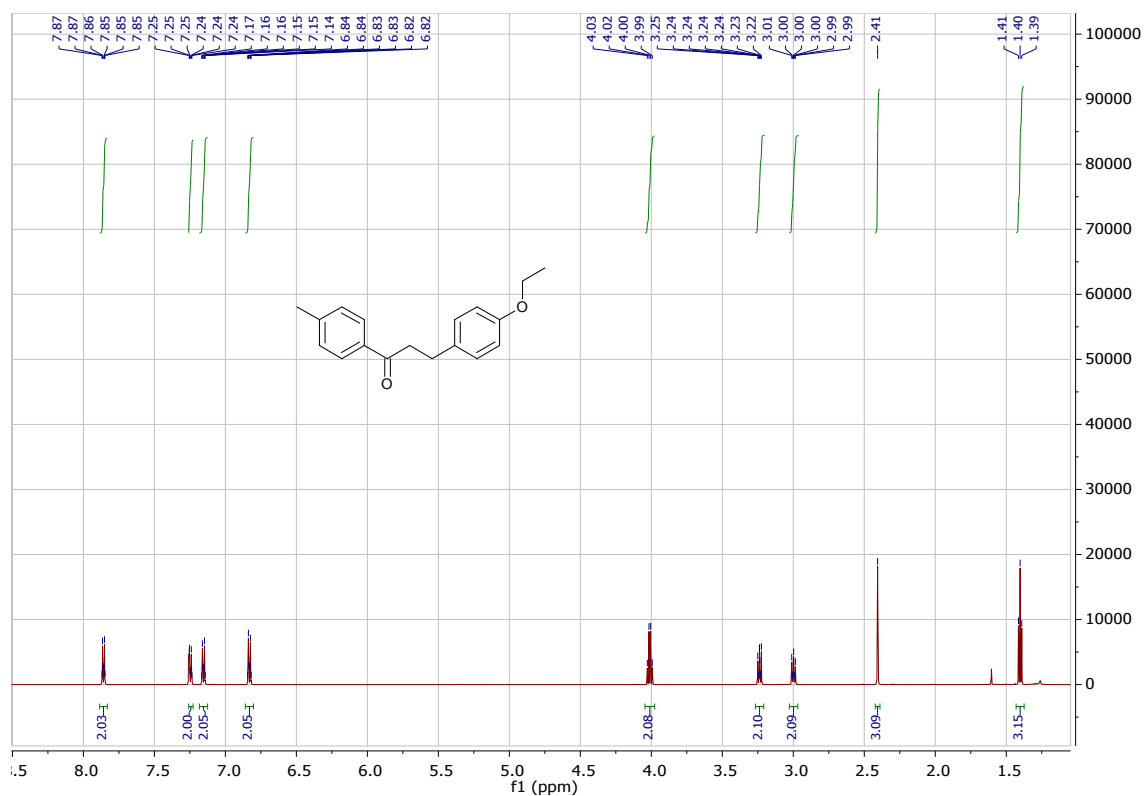

Fig S13.  $^1\text{H-NMR}$  (600 MHz,  $\text{CDCl}_3$ ) spectrum of 4-ethoxy-4'-methyl- $\alpha,\beta$ -dihydrochalcone (**6a**)

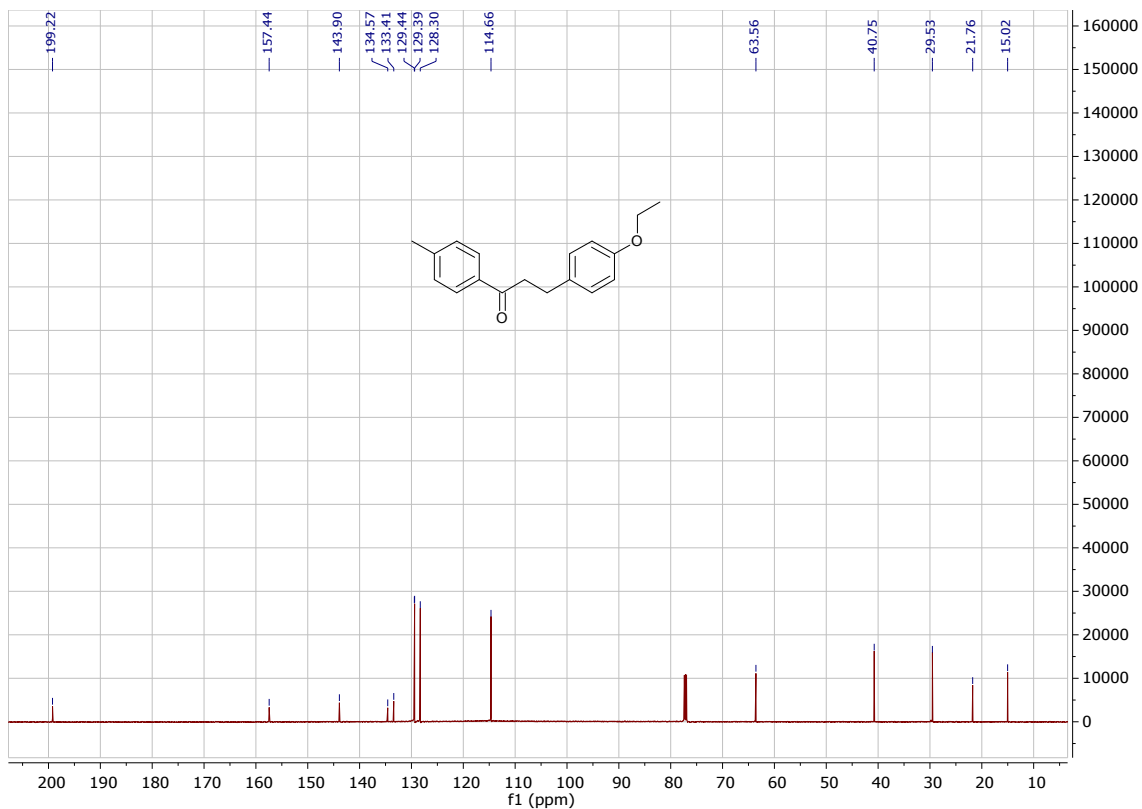

Fig S14.  $^{13}\text{C}$ -NMR (150 MHz,  $\text{CDCl}_3$ ) spectrum of 4-ethoxy-4'-methyl- $\alpha,\beta$ -dihydrochalcone (**6a**)

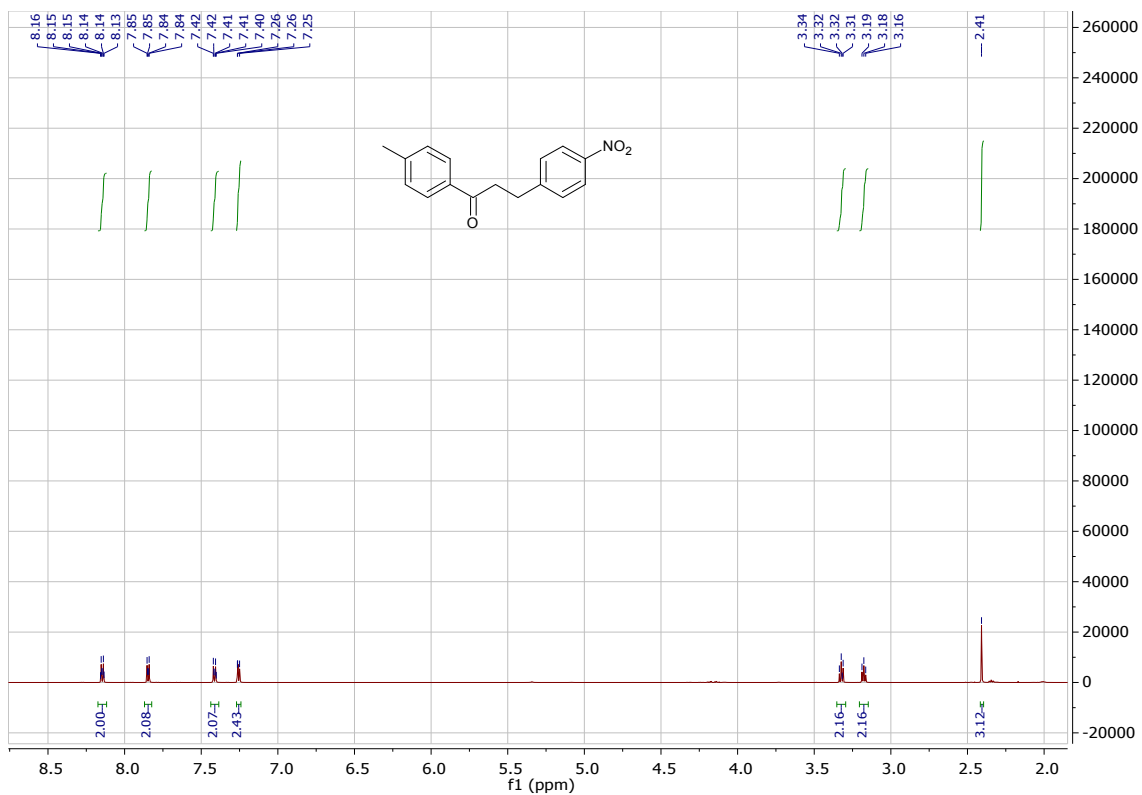

Fig S15.  $^1\text{H}$ -NMR (600 MHz,  $\text{CDCl}_3$ ) spectrum of 4'-methyl-4-nitro- $\alpha,\beta$ -dihydrochalcone (**7a**)



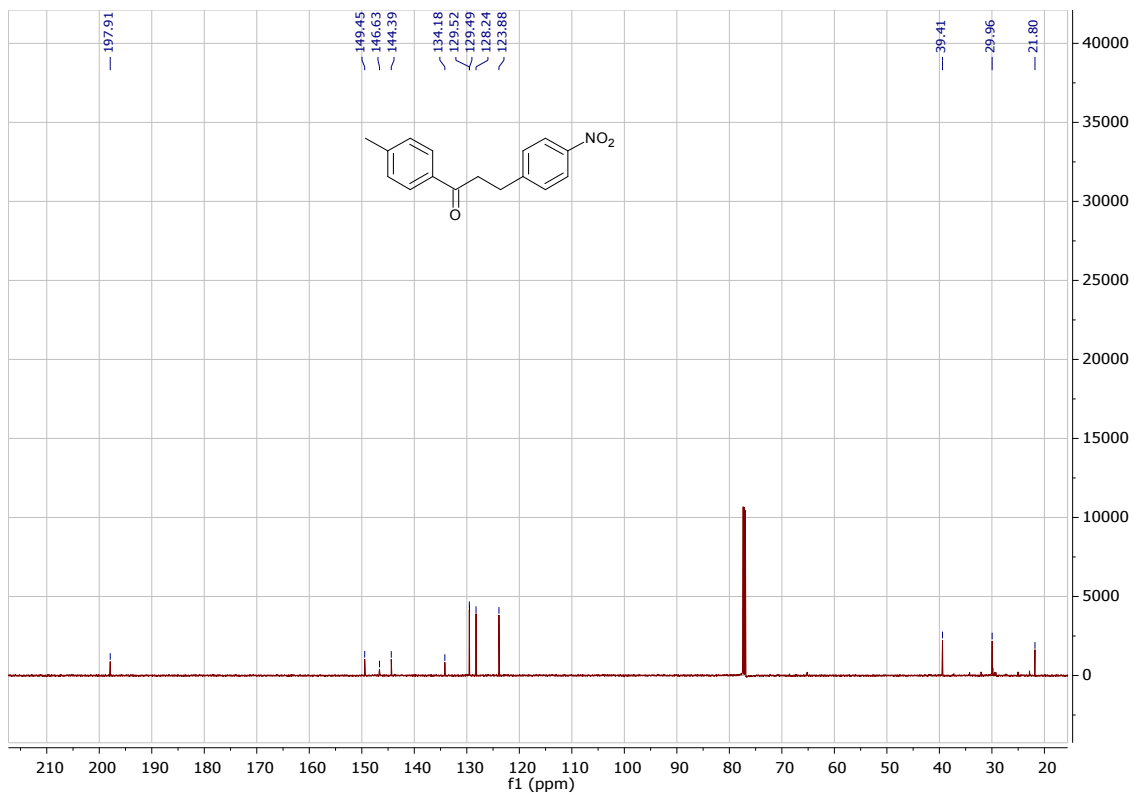

Fig S16.  $^{13}\text{C}$ -NMR (150 MHz,  $\text{CDCl}_3$ ) spectrum of 4'-methyl-4-nitro- $\alpha,\beta$ -dihydrochalcone (**7a**)

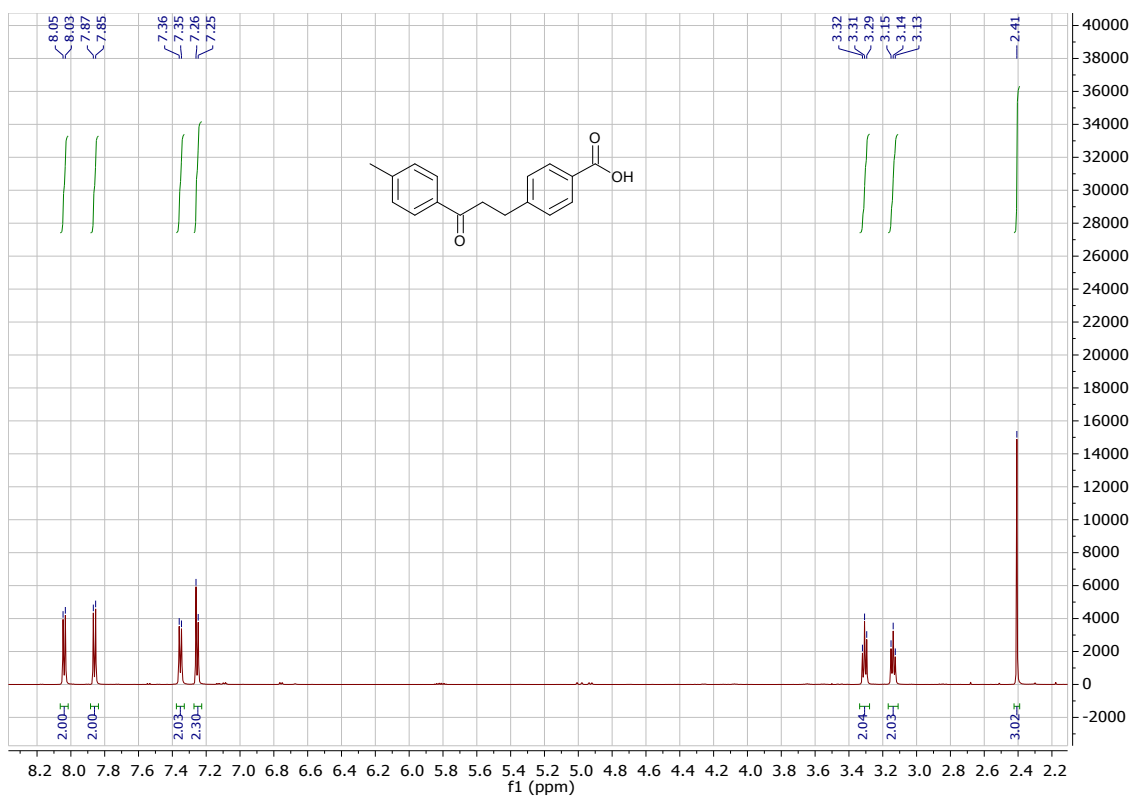

Fig S17.  $^1\text{H}$ -NMR (600 MHz,  $\text{CDCl}_3$ ) spectrum of 4-carboxy-4'-methyl- $\alpha,\beta$ -dihydrochalcone (**8a**)

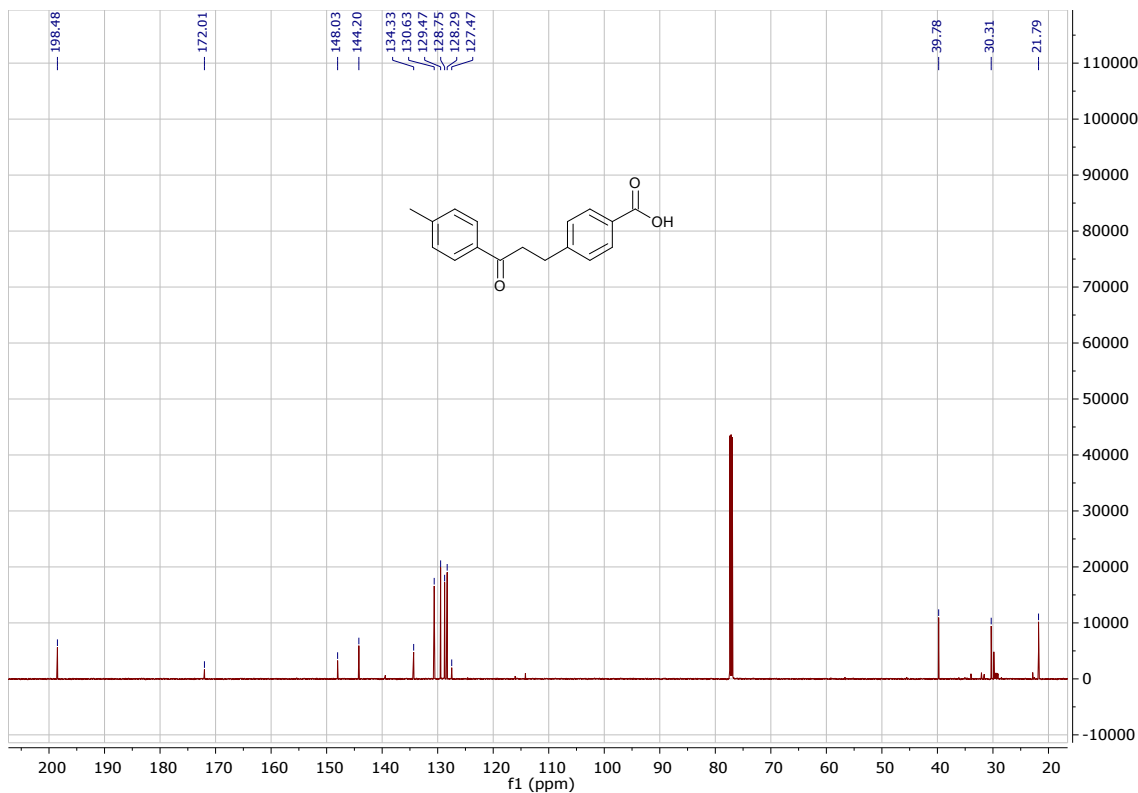

Fig S18.  $^{13}\text{C}$ -NMR (150 MHz,  $\text{CDCl}_3$ ) spectrum of 4-carboxy-4'-methyl- $\alpha,\beta$ -dihydrochalcone (**8a**)

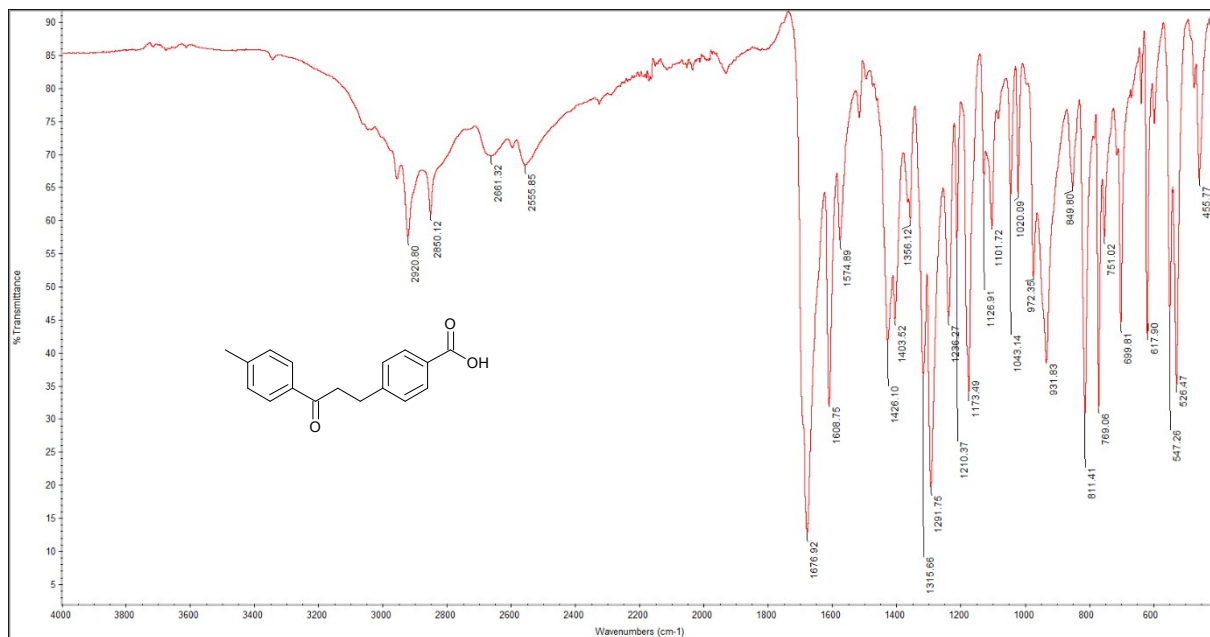

Fig S19. FTIR-ATR spectrum of 4-carboxy-4'-methyl- $\alpha,\beta$ -dihydrochalcone (**8a**)

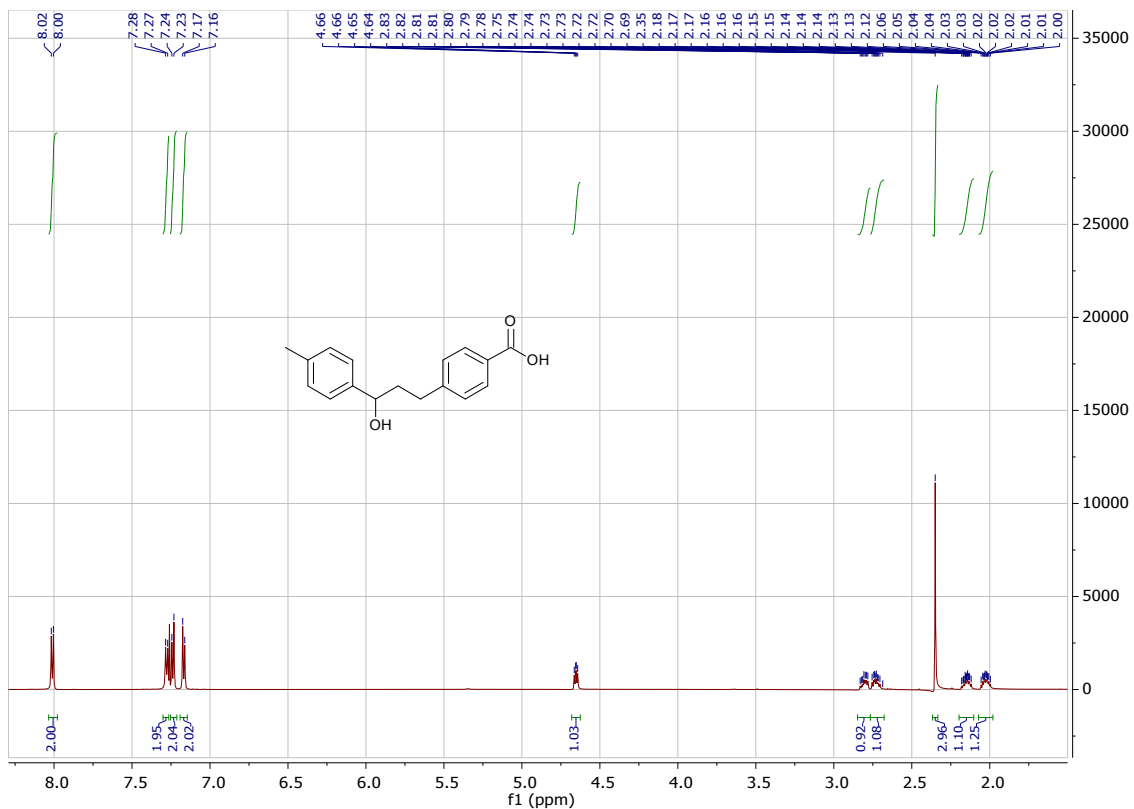

Fig S20. <sup>1</sup>H-NMR (600 MHz, CDCl<sub>3</sub>) spectrum of 3-(4-carboxyphenyl)-1-(4-methylphenyl)propan-1-ol (**8b**)

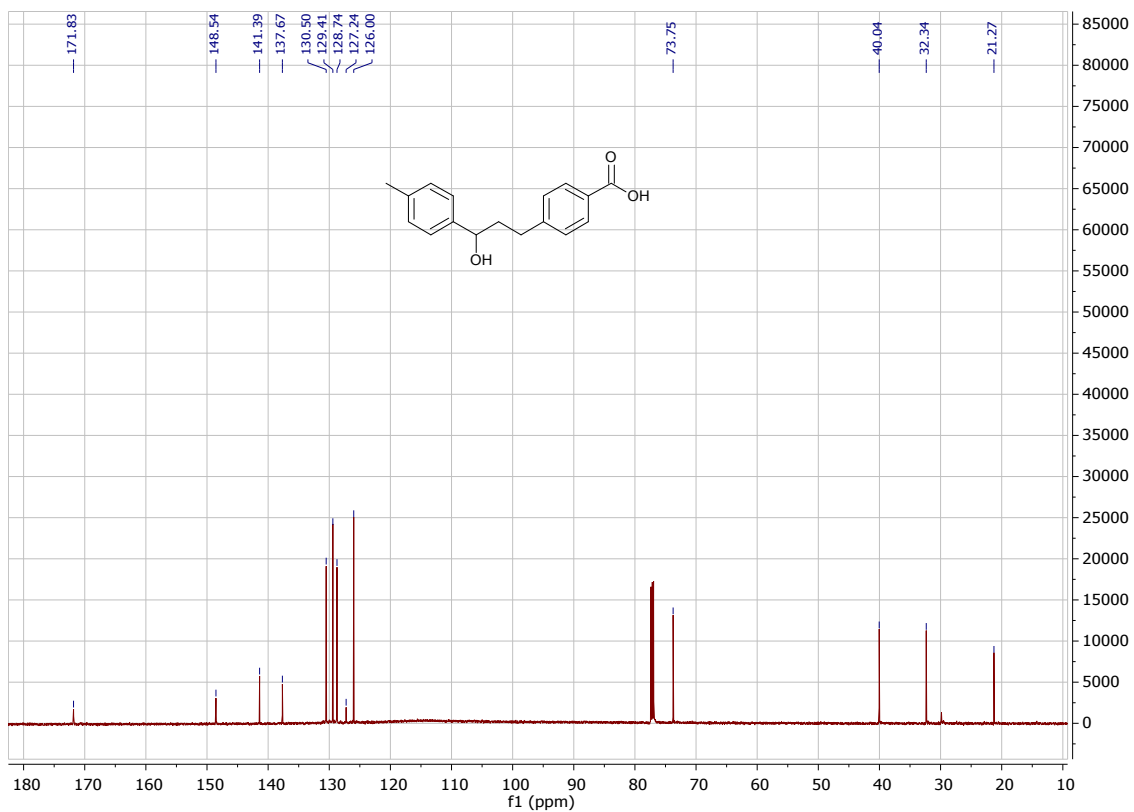

Fig S21. <sup>13</sup>C-NMR (150 MHz, CDCl<sub>3</sub>) spectrum of 3-(4-carboxyphenyl)-1-(4-methylphenyl)propan-1-ol (**8b**)

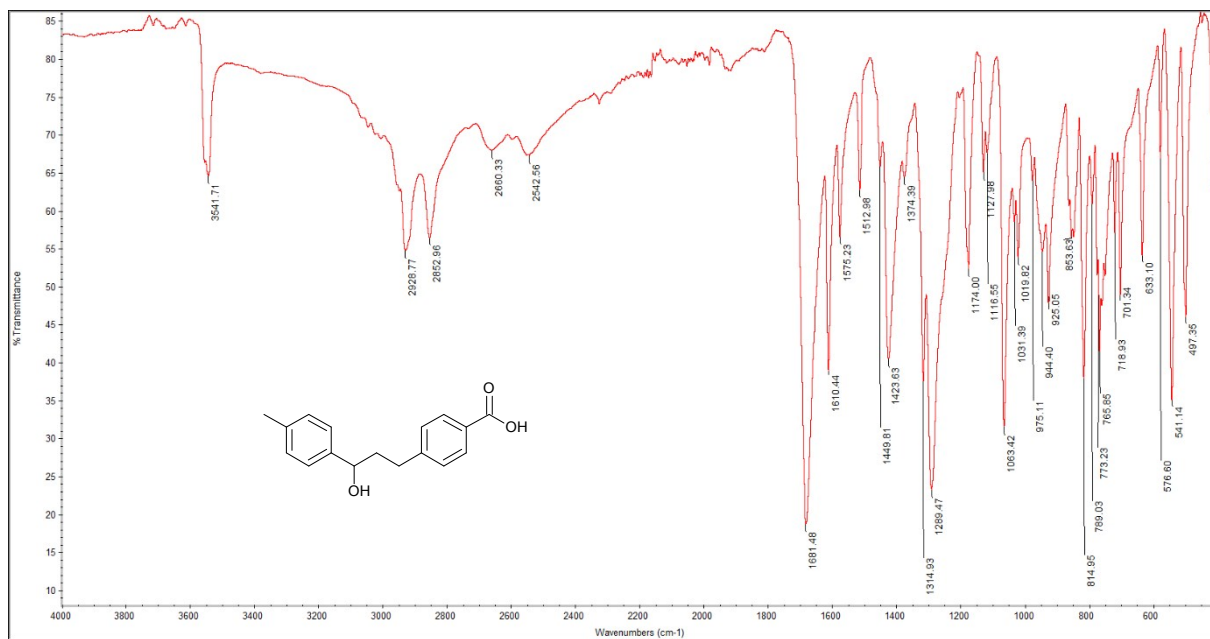

Fig S22. FTIR-ATR spectrum of 3-(4-carboxyphenyl)-1-(4-methylphenyl)propan-1-ol (**8b**)
